# Supplementary material
Source: publisher figshare collection journal article supplement (https://karger.figshare.com/ndownloader/files/17590430)
Supplement: Supplementary file 1 [file 17590430]

Supplementary Fig. S1.

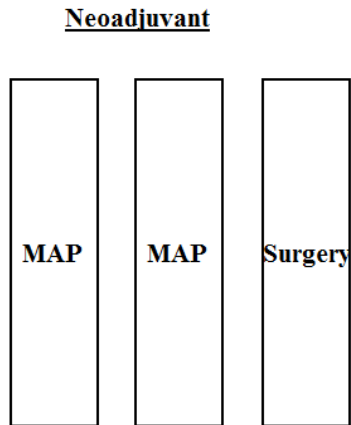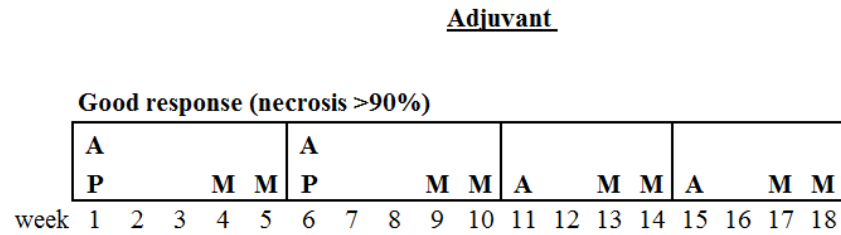

M= methotrexate 12 g/m<sup>2</sup>/day  
 A\* = doxorubicin 90 mg/m<sup>2</sup>/day  
 A= doxorubicin 37.5 mg/m<sup>2</sup>/day on day 1 and 2  
 P= cisplatin 60 mg/m<sup>2</sup>/day on day 1 and 2  
 I\* = ifosfamide 2.8 g/m<sup>2</sup>/day for 5 days  
 I= ifosfamide 3 g/m<sup>2</sup>/day for 3 days

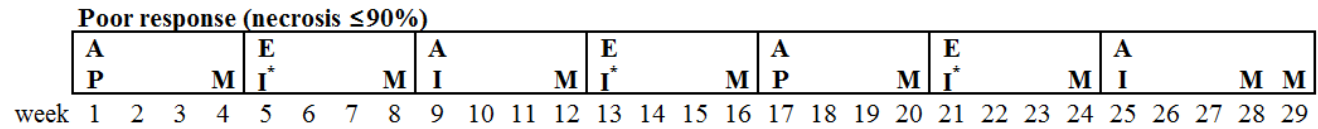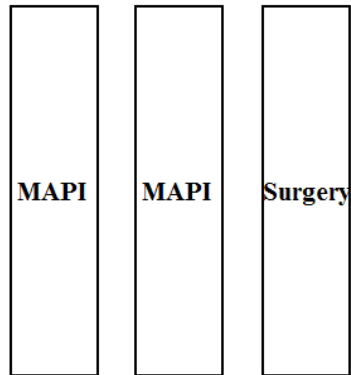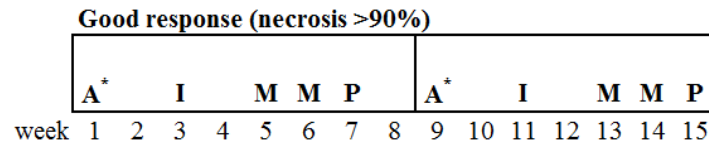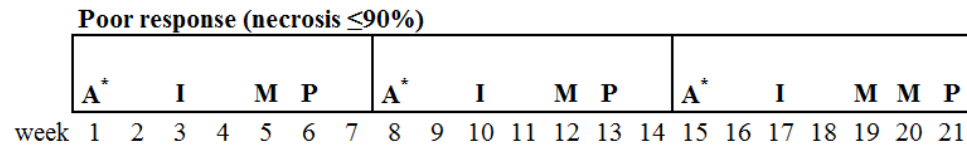

**Fig. S1.** Treatment scheme of the two adjuvant regimens. Treatment was tailored according to the histologic response of surgical specimens. For MAP therapy (upper panel), cisplatin (P), doxorubicin (A), and methotrexate (M) were given at the time points and doses depicted in the figure for a total of four courses in patients showing a good response. For those with a poor response, ifosfamide at two dose levels (I or I<sup>\*</sup>) and etoposide (E) were added to P, A, and M, and they were given as shown in the figure for a total of seven courses. For MAPI therapy (lower panel), doxorubicin at a higher dose than A (A<sup>\*</sup>), I, M, and P were administered at the time points and doses displayed in the figure for a total of two courses in patients showing a good response. For those with a poor response, A<sup>\*</sup>, I, M, and P were administered as shown in the figure for a total of three courses.

Supplementary Fig. S2.

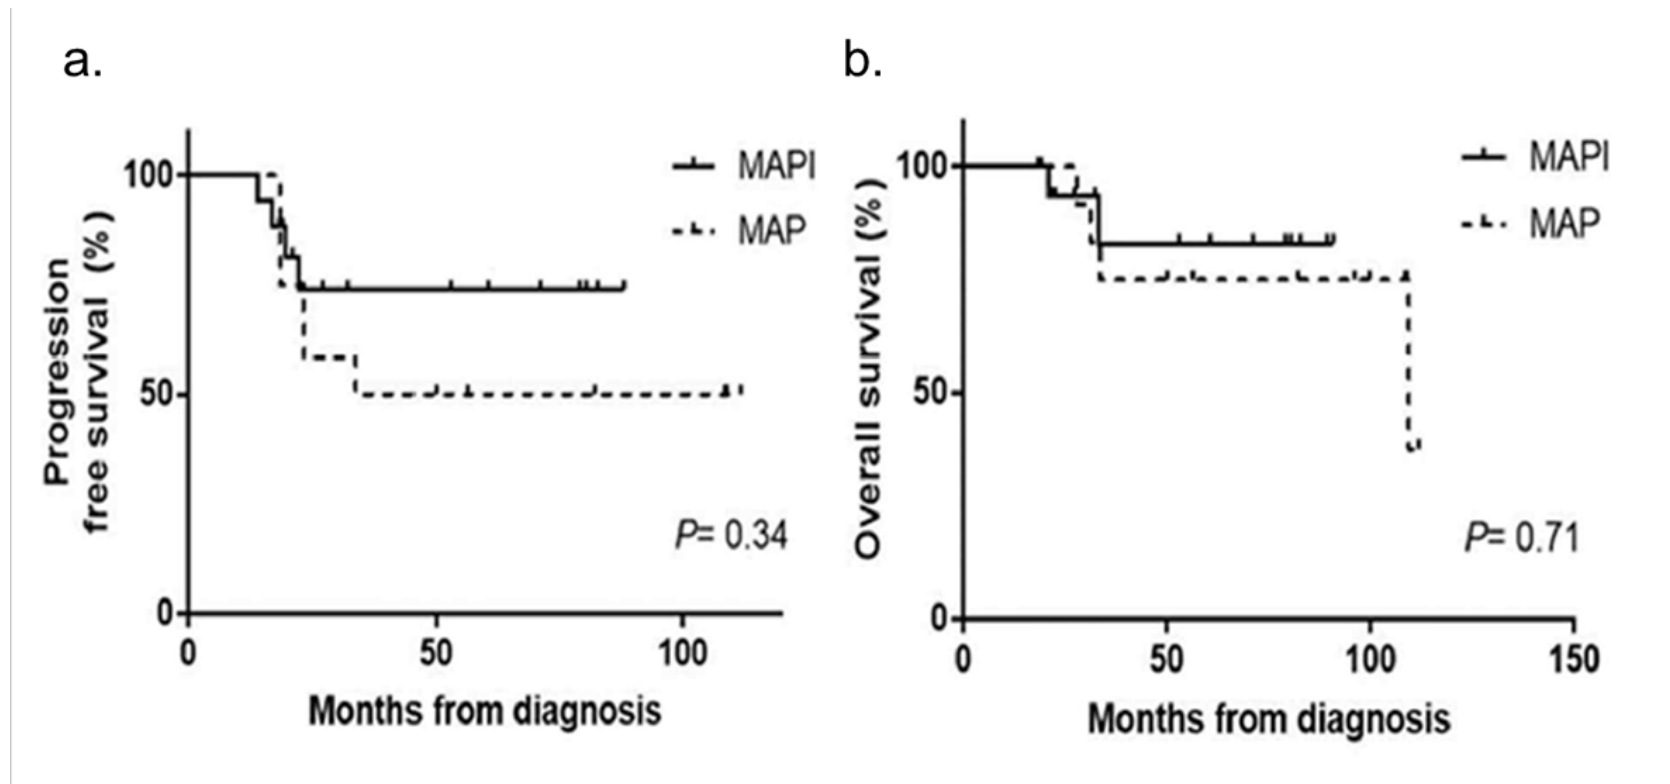

**Fig. S2.** Survival outcomes. Progression free survival (a) and overall survival (b) calculated by the Kaplan-Meier method. Ticks represent censored patients ( $n = 29$ ).

**Supplementary Table S1.** Variables associated with histologic response

| Variables                                        |                | <i>p</i>  | Univariate |            |
|--------------------------------------------------|----------------|-----------|------------|------------|
|                                                  |                |           | OR         | 95% CIs    |
| Regimen                                          | MAP            | Reference |            |            |
|                                                  | MAPI           | 0.12      | 3.36       | 0.71-15.85 |
| Sex                                              | Male           | Reference |            |            |
|                                                  | Female         | 0.64      | 1.43       | 0.32-6.32  |
| Age $\geq$ 18 years                              |                | 0.09      | 1.14       | 0.98-1.33  |
| Tumor location in the limb primaries             | Non-proximal   | Reference |            |            |
|                                                  | Proximal       | 0.63      | 1.59       | 0.24-10.57 |
| Histology                                        | Osteoblastic   | Reference |            |            |
|                                                  | Chondroblastic | 0.80      | 1.46       | 0.08-25.81 |
| Days from the start of chemotherapy to operation |                | 0.38      | 1.02       | 0.97-1.08  |
| Tumor volume $\geq$ 200 mL                       |                | 0.17      | 3.75       | 0.56-25.12 |

MAPI, methotrexate, doxorubicin, cisplatin, and ifosfamide; MAP, methotrexate, doxorubicin, and cisplatin; OR, odds ratio; CIs, confidence intervals.

**Supplementary Table S2.** Variables included in the univariate analysis for survival outcome

| Variables                  |                              | Progression-free survival |       |              | Overall survival |        |              |
|----------------------------|------------------------------|---------------------------|-------|--------------|------------------|--------|--------------|
|                            |                              | <i>p</i>                  | HR    | 95%CI        | <i>p</i>         | HR     | 95%CI        |
| Regimen                    | MAP                          | ref                       |       |              | ref              |        |              |
|                            | MAPI                         | 0.642                     | 0.751 | 0.225-2.507  | 0.718            | 1.392  | 0.231-8.378  |
| Sex, boys                  | Female                       | ref                       |       |              | ref              |        |              |
|                            | Male                         | 0.118                     | 2.898 | 0.763-11.009 | 0.201            | 4.192  | 0.467-37.640 |
| Age, older                 |                              | 0.828                     | 0.989 | 0.898-1.090  | 0.990            | 0.999  | 0.872-1.145  |
| Stage                      | <4                           | ref                       |       |              | ref              |        |              |
|                            | 4                            | 0.015                     | 4.423 | 1.339-14.604 | 0.035            | 10.590 | 1.177-95.241 |
| Pathologic fracture        | No                           | ref                       |       |              | ref              |        |              |
|                            | Yes                          | 0.575                     | 1.808 | 0.228-14.356 | 0.977            | 1.035  | 0.098-10.912 |
| Primary site               | Limb                         | ref                       |       |              | ref              |        |              |
|                            | Others                       | 0.481                     | 0.477 | 0.061-3.741  | 0.550            | 0.039  | 0-1647.088   |
| Tumor origin in long bone  | Non-proximal                 | ref                       |       |              | ref              |        |              |
|                            | Proximal                     | 0.004                     | 6.609 | 1.828-23.896 | 0.111            | 4.032  | 0.727-22.370 |
| Histologic type            | Osteoblastic                 | ref                       |       |              | ref              |        |              |
|                            | Chondroblastic               | 0.708                     | 0.046 | 0-473730.227 | 0.897            | 0.047  | 0-5.284E18   |
| Resection margin           | Complete                     | ref                       |       |              | ref              |        |              |
|                            | Incomplete                   | 0.269                     | 2.408 | 0.506-11.452 | 0.595            | 1.813  | 0.202-16.280 |
| Tumor volume $\geq 200$ ml |                              | 0.114                     | 0.274 | 0.784-9.575  | 0.288            | 2.649  | 0.438-16.008 |
| Histologic response        | Good (necrosis $>90\%$ )     | ref                       |       |              | ref              |        |              |
|                            | Poor (necrosis $\leq 90\%$ ) | 0.992                     | 0.993 | 0.296-3.336  | 0.299            | 2.461  | 0.450-13.464 |

MAPI, methotrexate, doxorubicin, cisplatin, and ifosfamide; MAP, methotrexate, doxorubicin, and cisplatin; HR, Hazard ratio; CIs, confidence intervals.
